# Supplementary material for: Facile synthesis of hierarchically porous carbonaceous materials derived from olefin/aldehyde precursors using silica as templates
Source: Royal Society of Chemistry journal article supplement (doi:10.1039/c8ra01270a), 2018-01-01
Supplement: c8ra01270a1.pdf [file c8ra01270a1.pdf]

## **Electronic Supplementary Information**

### **Facile synthesis of hierarchically porous carbonaceous materials derived from olefin/aldehyde precursors using silica as templates**

Shangjing Zeng, Shijun Liu, Yanlong Qi, Long Cui, Quanquan Dai, Chenxi Bai\*

Key Laboratory of Synthetic Rubber, Changchun Institute of Applied Chemistry, Chinese Academy of Sciences, Changchun 130022, Jilin, China

\*Corresponding author. *E-mail: baicx@ciac.ac.cn*

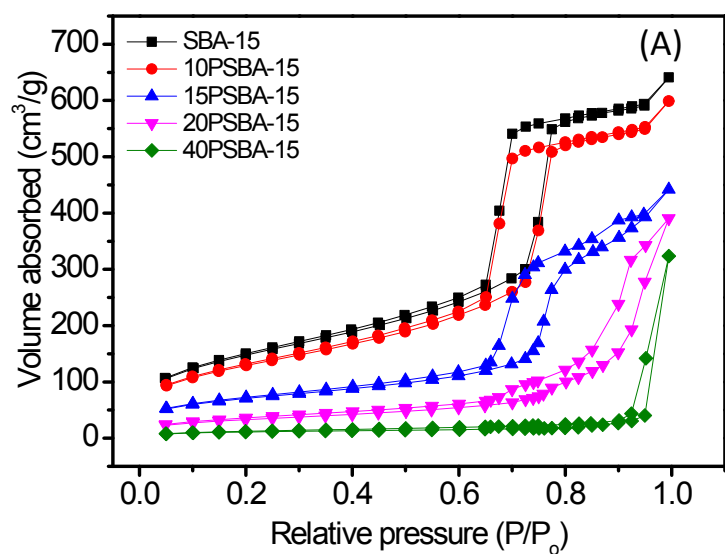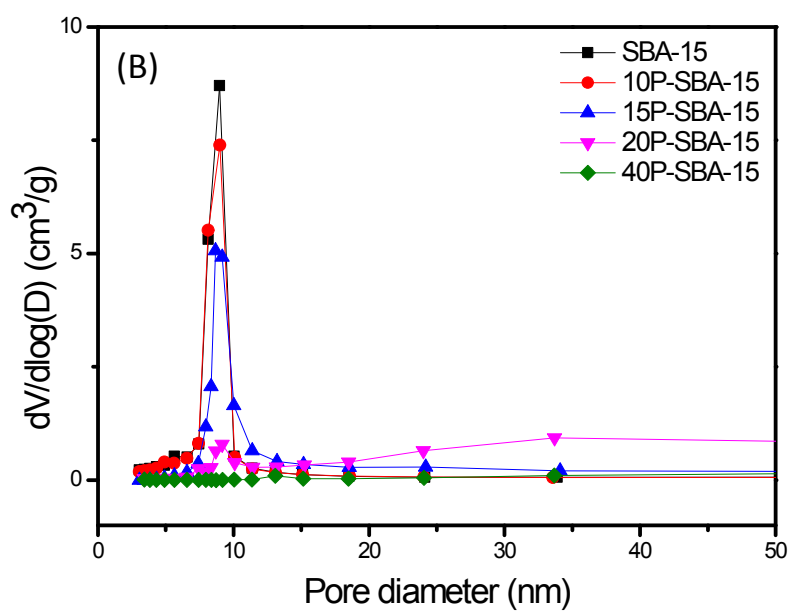

**Fig.S1** N<sub>2</sub> adsorption-desorption of SBA-15 modified by various amounts of phosphorous (A) and corresponding pore size distribution (B).

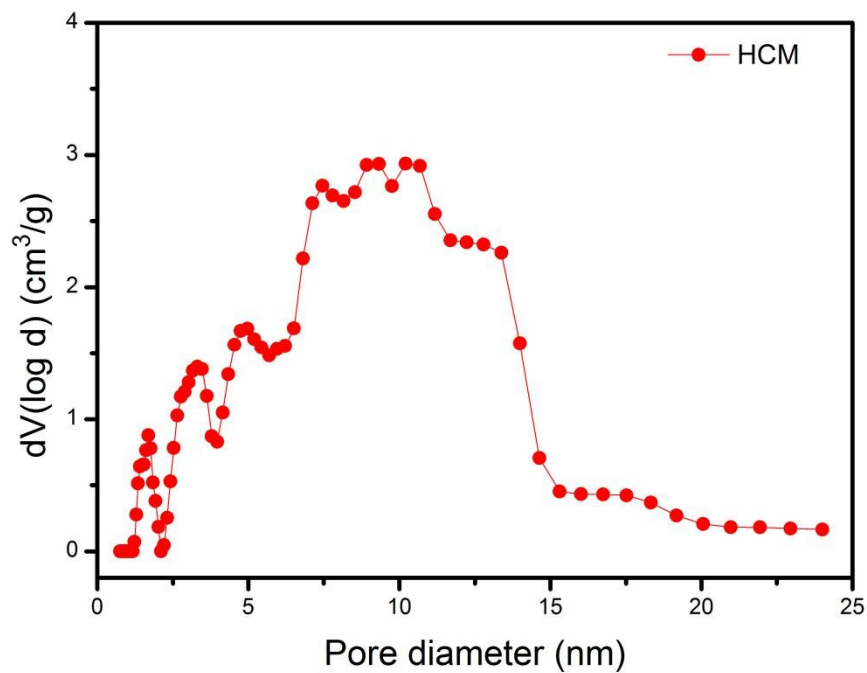

**Fig. S2** DFT pore size distribution of hierarchical porous carbon HCM-20 sample.

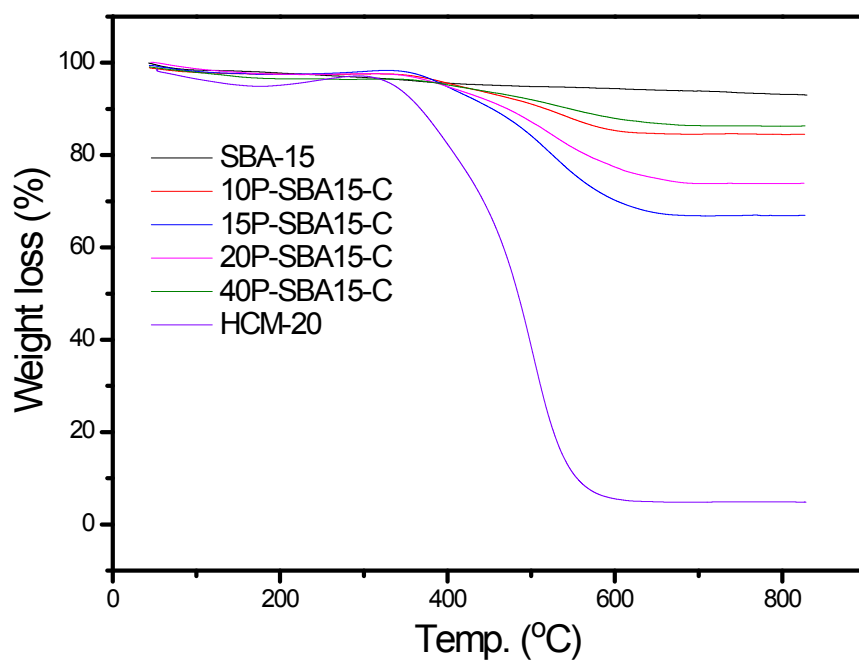

**Fig. S3** TG curves of obtained carbonaceous composites with various amount of phosphorus

contents and HMC material.

**Table S1** Textural properties of SBA-15, silica/carbon composites with various amount of phosphorus contents and corresponding derived carbon materials

| Sample                 | $S_{\text{BET}}^{\text{a}}/\text{m}^2\text{g}^{-1}$ | $V_{\text{total}}/\text{cm}^3\text{g}^{-1}$ | Pore size <sup>b</sup> /nm |
|------------------------|-----------------------------------------------------|---------------------------------------------|----------------------------|
| SBA-15                 | 532.1                                               | 1.0                                         | 8.9                        |
| 10-PSBA15 <sup>c</sup> | 461.6                                               | 0.93                                        | 8.9                        |
| 15-PSBA15              | 243.9                                               | 0.69                                        | 8.7                        |
| 20-PSBA15              | 117.8                                               | 0.61                                        | 9.1                        |
| 40-PSBA15              | 37.6                                                | 0.50                                        | —                          |
| HCM-10                 | 51.3                                                | 0.06                                        | —                          |
| HCM-20                 | 971.0                                               | 1.91                                        | 15.2-24.2                  |
| HCM-30                 | 854.3                                               | 1.24                                        | 8.3                        |
| HCM-40                 | 734.8                                               | 0.60                                        | 3.8                        |

a. Determined by multi-point BET.

b. Determined by BJH method.

c. The number represents various amount of phosphorus contents.
